# Supplementary material for: The platelet and coagulation function parameters in late pregnancy are associated with preeclampsia and its severity: a single-center retrospective study
Source: PeerJ. 2025 Sep 8;13:e19916. doi: 10.7717/peerj.19916 (PMC12424609; doi:10.7717/peerj.19916)
Supplement: Supplemental Information 1 — Demographic and clinical data of all study subjects [file peerj-13-19916-s001.xls]

## Sheet: PE-Group
Index	Age	BMI	Gravidity	Parity	SBP	DBP	FBG	PC	MPV	PCT	PDW	APTT	TT	FIB	PT	D-dimer	Outcome
20172996	29	26.71	1	0	121	75	4.87	101	10	0.101	16.3	25.9	14.7	5.1	11.2	1030	1
20093018	27	29.11	1	0	119	74	4.31	206	10.1	0.346	16.7	24.3	17.87	2.53	11.1	22090	2
20096292	34	29.78	4	1	124	86	4.97	153	12.3	0.189	16.7	27.4	17.8	4.19	10.1	/	2
20096480	29	25.1	1	0	114	81	4.09	163	8.9	0.145	15.7	26.6	19	2.3	10.5	1590	2
20097919	33	24.84	3	1	107	77	4.32	158	11.2	0.178	16.5	29.3	19	2.09	11	2060	2
20188086	35	24.34	1	0	124	68	4.28	89	12.2	0.109	17.2	26	16.2	4.28	9.9	3090	1
20099829	22	20.7	2	0	124	95	4.35	156	10.4	0.163	15.9	30.6	20	2.43	10.5	1140	2
20102797	37	34.38	7	3	132	86	5.25	197	11.7	0.231	16.9	25.3	17.5	4.91	11.9	1410	2
20103642	28	27.47	2	0	120	71	3.95	183	10	0.183	16.2	25.5	18.8	4.18	10.4	2870	2
20104707	25	26.44	1	0	119	82	4.22	205	9	0.185	16.4	26.4	18.4	2.67	10.9	4180	2
20105645	26	33.04	2	0	130	73	4.33	171	9.7	0.166	16.3	29	17.9	5.08	11.5	1690	2
20106303	25	26.04	1	0	132	83	4.22	178	10.5	0.187	16.7	29.1	18.6	4.06	10.7	1840	2
20139171	26	25.64	1	0	120	80	3.76	108	10.7	0.115	17.1	24.7	18.5	3.73	9.9	1650	1
20107207	25	25.44	1	0	107	77	3.99	129	10.6	0.136	16.8	28.4	18.6	2.92	11.5	1950	2
20108656	33	29.98	2	0	133	75	3.89	196	10.5	0.206	16.4	27.2	18.8	3.93	10.7	1310	2
20109547	29	28.7	1	0	119	86	4.42	154	9.9	0.153	16.5	26.9	18.5	4.91	11.1	1880	2
20109881	30	28.28	2	0	115	67	4.44	306	8.3	0.255	15.7	26.5	18	4.6	10.5	860	2
20111463	25	23.05	1	0	114	72	4.55	124	10.8	0.133	16.9	25.2	17.1	3.75	10.6	3350	2
20112252	31	30.12	1	0	105	73	4.82	249	9.3	0.232	16.2	24.6	18	3.03	10.8	3790	2
20112471	28	27.67	1	0	117	73	4.15	210	11.3	0.236	16.6	23.5	21.9	3.32	10.1	1500	2
20112962	27	35.63	4	1	127	88	3.98	169	10.4	0.176	16.5	24.4	18.5	2.27	9.4	1110	2
20113267	33	27.54	1	0	129	71	4.29	149	12.7	0.189	16.5	27.2	17.7	4.72	10.6	920	2
20113705	38	26	3	1	137	80	5.07	246	8.8	0.217	16.3	25.5	16.4	4.73	11.1	1570	2
20113834	31	27.93	1	0	102	73	4.23	172	10.5	0.18	16.2	26.9	21.7	3.67	10.1	900	2
20114568	27	35.63	4	1	125	79	5.94	169	10.4	0.176	16.5	24.4	18.5	2.27	9.4	1110	2
20140964	17	24.65	1	0	128	77	3.78	114	10.5	0.12	16.5	31.7	18.4	2.17	11.3	3040	1
20115391	31	34.77	2	1	138	87	5.73	154	9	0.138	16.3	26.6	16.7	4.1	10.1	3490	2
20180766	27	29.43	1	0	112	72	3.84	100	12.8	0.128	17	27.1	16.3	3.49	9.7	1590	1
20106962	31	25.1	1	0	95	52	3.82	125	10.8	0.135	16.7	27.9	17.8	3.87	10.8	2860	1
20191691	26	27.06	1	0	123	74	3.59	116	12.9	0.135	16.9	26.9	15.4	3.92	10.4	1770	1
20164427	28	26.19	1	0	122	83	5.5	120	11.5	0.138	17.2	25.6	16.9	6.42	11	620	1
20192514	31	25.48	1	0	130	76	3.59	132	12.4	0.142	16.7	37	15.1	4.48	10.9	2090	1
20167818	28	26.45	1	0	109	68	3.81	134	10.7	0.144	16.2	27.3	17	3.63	10.1	344	1
20121906	32	30.25	1	0	106	63	4.72	137	10.6	0.145	16.4	25.6	17.2	4.5	10.3	2000	1
20165746	33	31.83	2	1	134	81	4.39	169	8.7	0.146	16.3	26.8	16.2	4.63	11.5	1070	1
20117039	29	22.83	1	0	126	82	4.5	191	11.2	0.215	16.4	23.7	17.7	3.51	10.1	/	2
20116314	27	28.91	1	0	116	74	4.03	129	11.5	0.149	17.2	33.7	18.7	2.28	11.5	4020	1
20122753	27	24.44	1	0	107	68	4.4	193	7.7	0.149	15.5	26.4	17	3.83	10.4	1500	1
20175055	27	28.96	2	0	128	74	4.51	165	9	0.149	16.3	26.1	15.6	6.09	11.3	1200	1
20181466	30	27.28	1	0	117	73	3.67	126	12.1	0.152	17.3	27.9	16.3	4.46	10.2	1740	1
20177531	29	28.28	1	0	126	84	3.98	117	13.1	0.153	17	27.1	16.6	4.76	10.2	1520	1
20117952	25	39.33	1	0	132	83	3.65	151	13.1	0.197	16.81	24.6	18.1	3.3	10.8	4200	2
20163265	33	27.64	3	1	125	76	4.07	113	13.6	0.154	17	25.2	19	4.27	10.6	2810	1
20098312	27	24.87	1	0	118	70	3.55	124	12.5	0.155	16.6	29.2	18.4	2.34	9.9	2100	1
20190645	31	28.19	1	0	128	71	4.09	137	11.4	0.155	16.3	30.9	16.3	3.67	10.3	1930	1
20163310	30	28.72	1	0	130	77	4.38	175	8.9	0.156	16.4	28.4	16.7	4.09	10.6	5320	1
20171610	33	22.41	1	0	127	84	3.6	145	10.8	0.156	16.4	26.4	16	5.1	10.2	2400	1
20121974	33	27.32	1	0	128	77	4.98	146	10.8	0.157	16.3	31.8	16.4	4.62	11.4	3360	1
20118545	28	29.14	1	0	111	64	4.22	100	14.1	0.141	16.8	28.9	16.4	3.92	10.5	2540	2
20140090	34	21.26	4	1	113	69	3.59	118	13.3	0.158	16.4	24.1	18.5	3.92	10.2	2200	1
20191200	34	28.67	1	0	127	67	3.87	124	12.8	0.159	17	28.2	15.4	3.62	9.9	2190	1
20181391	27	26.99	1	0	120	69	3.96	132	12.1	0.16	16.9	27.1	17.3	4.74	9.7	1770	1
20140534	32	24.86	1	0	127	78	4.51	116	13.8	0.16	16.7	29.4	18.2	4.9	10.5	1410	1
20162208	35	32.45	4	1	127	74	4.21	158	10.1	0.161	16.9	26.4	16.6	4.4	10.7	1600	1
20166678	27	28.13	1	0	115	64	3.7	137	11.7	0.161	16.8	26.4	18	2.99	10.4	6610	1
20141385	28	28.34	1	0	128	78	4.08	146	11.1	0.162	16.4	24.9	18.7	3.56	10.2	3960	1
20168890	25	27.51	1	0	118	84	3.86	137	11.9	0.163	16.8	27.7	17.8	4.49	10.4	1710	1
20116467	23	38.44	2	0	133	82	4.25	160	10.3	0.164	16.2	25.1	16.9	3.92	9.8	1660	1
20120582	32	26.03	1	0	108	74	4.52	115	11.1	0.128	16.7	23.4	18	1.43	10.4	23910	2
20120703	26	25.16	1	0	118	68	4.42	166	11.1	0.185	16.2	26.7	18.3	3.23	10.8	2110	2
20171006	30	31.72	1	0	125	73	4.69	146	11.3	0.165	16.8	24.5	16.7	4.51	10.1	1380	1
20121080	26	25.92	2	0	129	81	4.01	127	11.3	0.143	16.7	26.6	18.2	3.92	11	2160	2
20162713	27	24.84	1	0	116	67	3.83	145	11.5	0.166	16.7	27.8	16.6	3.26	10.3	1500	1
20190157	32	24.8	1	0	119	71	3.79	155	10.7	0.166	16.7	29.4	16.1	4.9	10	2500	1
20140102	27	29.45	1	0	129	87	4.08	159	10.5	0.168	16.6	25.4	17.7	3.64	10	2370	1
20117855	30	24.46	1	0	101	64	4.53	142	11.9	0.169	16.7	23.8	16.3	3.3	9.6	4420	1
20121922	30	27.85	1	0	119	71	4.89	100	12.1	0.122	16.9	29.6	18.1	1.84	11.1	10050	2
20121960	37	21.7	3	0	120	81	5.36	194	9.9	0.191	16.1	25.6	16.7	4.75	10.9	1140	2
20161676	42	29.21	2	1	131	82	4.59	160	10.6	0.169	16.8	30.1	17.4	4.17	10.3	2100	1
20161996	30	30.85	1	0	120	78	4.48	164	10.4	0.17	16.6	26.3	18.7	3.68	9.9	3250	1
20162555	37	30.85	1	0	108	61	4.31	149	11.4	0.17	17.3	24.5	17.1	5.74	10.1	2570	1
20163829	28	25.04	1	0	120	80	3.47	165	10.3	0.17	16.3	31.1	17.5	4.49	10.5	1470	1
20122820	34	28.52	1	0	127	71	4.41	193	9.8	0.189	16.1	24.7	18.1	3.74	10	4310	2
20179218	29	27.55	1	0	111	67	4.18	161	10.5	0.17	16.4	29.6	16.7	3.49	9.6	1770	1
20140068	38	28.36	1	0	124	78	3.78	155	10.9	0.17	16.4	26.5	19.7	3.92	9.9	2050	1
20140417	37	27.24	3	1	122	75	3.77	161	10.7	0.171	16.8	27.9	16	4.42	10.8	1500	1
20123647	30	29.24	1	0	135	63	4.87	140	12.6	0.176	16.7	28.7	18	4.1	10.4	3850	2
20124115	33	33.73	4	1	136	87	4.94	209	9.7	0.203	16.2	26.2	15.6	4.83	11.14	550	2
20124955	31	31.62	1	0	126	82	4.02	169	9.8	0.165	16.5	29.4	17.1	3.75	11.2	2030	2
20186683	25	26.67	1	0	105	81	4.67	136	12.7	0.172	17.2	24.2	16.1	3.92	9.9	1800	1
20126660	33	26.95	1	0	126	84	4.72	169	10.6	0.179	16.8	26.5	16.2	5.82	11.4	2740	2
20128534	29	28.34	2	1	125	73	3.84	150	12.8	0.192	16.9	25.4	19.5	4.29	10.6	2230	2
20130066	38	30.61	1	0	110	62	4.3	250	10.1	0.253	16.1	23.7	16.4	4.76	10.5	/	2
20131534	29	28.52	1	0	117	79	4.11	280	9.9	0.277	16.2	29.9	15.9	5.82	11	/	2
20131971	26	26.67	1	0	115	67	4.48	119	11.8	0.141	16.8	29.3	15.3	4.62	10.5	1970	2
20132476	28	27.24	1	0	111	65	4.23	258	10.5	0.272	16.4	29.3	16.8	3.45	9.7	6140	2
20133252	36	27.05	3	1	110	68	4.77	177	11.2	0.199	16.6	25.5	16.7	4.71	10.5	1500	2
20134191	30	28.48	4	0	116	68	4.01	184	10.5	0.193	15.7	24.2	17.3	3.82	10.2	1280	2
20134598	35	25.11	1	0	123	80	3.7	166	11	0.182	16.8	26.8	15.7	5.73	12	1540	2
20135594	34	25.99	2	1	115	69	4.16	120	12.2	0.146	16.8	24.7	18.7	4.03	9.5	1160	2
20137337	33	26.91	3	1	132	78	3.74	203	9.3	0.189	15.7	27.9	17.1	5.73	11	1110	2
20138429	24	31.77	2	0	126	71	4.33	234	9.6	0.224	16.2	24.3	18.6	3.92	9.9	360	2
20138510	32	26.04	1	0	123	74	4.81	158	11.6	0.183	16.6	27.3	17	4.56	10.5	2700	2
20138568	39	33.49	1	0	125	68	4.61	218	9.9	0.216	16.8	26.1	16.8	5.22	9.8	5870	2
20139232	25	21.43	1	0	114	75	4.35	85	12.7	0.108	16.9	28.1	17.6	3.92	10.9	1940	2
20139253	32	25.07	3	0	110	66	4.19	162	10.9	0.177	16.3	27.3	19.3	3.73	10.1	1130	2
20139328	26	24.61	1	0	112	76	3.56	250	10	0.251	15.8	26	16.2	4.03	11	620	2
20142502	25	27.55	2	0	112	62	4.23	208	10.6	0.22	17.2	26.3	20.1	4.16	11.4	/	2
20143026	35	28.34	3	0	128	69	4.11	90	10.7	0.097	16.1	30	20.5	2.87	10.9	15880	2
20144962	29	28.35	1	0	93	59	4.37	181	10.9	0.197	16.3	24	18.5	4	10.7	2210	2
20145951	32	24.87	1	0	112	68	4.78	206	11.2	0.23	16.2	28.9	17.4	4.98	10.8	1670	2
20146906	30	24.44	4	1	124	81	4.95	133	9	0.12	16.2	29.2	18.2	3.25	10.5	1800	2
20147183	30	26.23	1	0	127	78	4.228	120	10.9	0.132	16.9	38	26.2	0.8	11.8	242200	2
20147314	25	28.12	2	0	117	82	4.64	206	8.9	0.183	15.8	26.2	17.8	3.51	10.7	1540	2
20149321	30	25.21	3	0	111	72	4.12	116	12.7	0.147	17	28.7	17.4	3.49	9.8	5020	2
20152408	30	25.97	3	1	111	73	4.4	98	11.7	0.109	16.9	27.6	18.4	2.79	10.7	960	2
20154291	31	28.17	1	0	130	76	4.65	173	10	0.172	16.4	25.6	18.3	3.31	10	1670	2
20155391	33	31.24	3	1	112	77	4.37	125	12.4	0.154	16.8	25.5	18.5	3.25	9.3	4870	2
20155471	35	30.04	1	0	103	65	4.31	210	9	0.189	16.1	25.7	18.3	2.9	10.5	4260	2
20156025	39	31.2	2	0	138	88	4.63	187	12.4	0.232	16.6	27.9	17.3	5.3	11.1	1190	2
20156419	28	33.01	1	0	132	81	4.1	253	8.8	0.222	15.9	25.2	18.4	4.61	10.3	1090	2
20156502	32	30.11	3	1	122	60	4.24	200	8.8	0.176	15.9	28.7	18.2	4.19	10.4	780	2
20157660	25	26.26	1	0	120	60	3.97	150	14.8	0.222	17.5	24.5	16	5	10.4	780	2
20158078	25	27.55	1	0	121	72	3.99	219	12.2	0.267	16.3	28.4	18.2	4.17	9.7	2050	2
20158142	39	31.2	2	0	133	87	4.63	187	12.4	0.232	16.6	27.9	17.3	5.3	11.1	1190	2
20158445	29	25.64	1	0	129	76	3.79	202	10.3	0.207	16	25.6	19.5	2.9	9.5	2180	2
20160032	28	27.68	1	0	120	68	4.17	205	10	0.204	16.5	27.8	16.9	4.25	10.4	3170	2
20161079	31	32.27	1	0	96	75	4.61	257	11	0.283	16.4	25.2	17.8	5.12	10.2	1030	2
20161267	30	23.98	1	0	117	63	4.36	117	12.5	0.14	16.6	35.3	21.5	3.33	11.6	3560	2
20141101	31	26.95	3	0	136	84	3.72	203	8.5	0.172	16	26.6	17.5	4.9	10.9	1760	1
20117518	27	28.9	3	0	100	62	4.16	207	8.4	0.173	15.9	27.3	16.7	2.89	10.3	4690	1
20164815	26	27.64	1	0	130	73	4.39	151	11.5	0.174	16.6	27.2	17.1	5.55	9.9	6800	1
20161896	36	28.28	1	0	127	82	4.29	104	12.4	0.124	16.9	31.8	17.7	4.4	10.2	2160	2
20121294	27	31.96	1	0	108	79	4.58	185	9.4	0.175	16.4	25.2	17.5	4.1	10.8	2320	1
20163586	33	27.9	1	0	116	67	4.63	150	11.7	0.176	17.2	29.4	16.9	4.27	10.7	1130	1
20162098	26	28.44	1	0	123	74	4.52	135	10.8	0.146	17	27.7	17.6	5.82	10.8	2300	2
20116817	33	27.43	1	0	119	69	4.29	162	10.9	0.177	16.6	26.9	17.2	5.78	10	1820	1
20191978	25	27.58	2	0	129	78	3.66	136	13	0.178	16.8	26.3	17.4	3.45	10.1	3410	1
20119662	26	30.78	1	0	130	74	4.61	163	11	0.179	16.6	27.5	17.7	3.32	10.5	780	1
20162446	31	29.76	1	0	137	84	4.41	141	12.2	0.171	16.8	25.5	17.4	4.78	10.3	2080	2
20183920	33	30.66	1	0	123	82	4.85	155	11.5	0.179	17	24.7	15.1	5.22	11.3	2160	1
20162541	29	31.18	2	0	127	79	4.59	102	10.5	0.107	16.5	25.5	17.1	6.11	10.7	3610	2
2019068	25	30.84	1	0	131	75	3.79	153	12	0.182	16.6	26.6	15.5	3.59	10.6	3960	1
20162383	32	30.04	1	0	128	83	4.06	145	12.5	0.182	17.2	29.5	19.8	3.68	10.9	2010	1
20162790	33	28.72	1	0	111	74	4.1	159	13.5	0.214	16.3	26.2	17.7	4.91	9.4	2860	2
20164388	31	31.56	3	1	115	71	4.27	207	8.9	0.184	16.2	27.8	18.6	4.4	9.2	6540	1
20167672	28	23.15	1	0	128	69	4.19	147	12.5	0.184	16.7	27.4	17.7	4.9	9.6	1350	1
20165660	26	28.56	2	0	127	74	3.73	166	11.1	0.185	16.6	31.4	18	5	11.3	1290	1
20189055	33	28.24	1	0	111	72	4.48	179	10.3	0.185	16.5	28.5	16	4.56	10.5	1630	1
20123070	29	27.99	1	0	104	73	3.81	190	9.9	0.187	16.7	28.8	19.3	5	10.2	1920	1
20162164	31	34.56	3	1	126	73	6.01	171	10.9	0.187	16.9	25.8	16.7	5.82	10	1340	1
20179190	26	27.1	1	0	124	61	4.19	155	12.1	0.188	16.8	28.4	16.2	4.51	10.8	1590	1
20117351	26	25.89	2	0	122	79	4.73	194	9.7	0.189	16.5	24.2	17.1	3.92	10	1580	1
20170057	28	28.3	2	0	122	66	4.4	175	10.8	0.189	16.7	29.1	17.6	5.15	10.7	1590	1
20183928	31	26.84	1	0	100	59	4.63	186	10.2	0.189	16	28.8	16	5.04	10.4	1220	1
20141264	31	28.65	2	1	119	70	3.94	211	9	0.189	16.2	25.9	17.4	4.87	11.4	1670	1
20123037	31	25.81	1	0	122	63	4.55	187	10.2	0.19	16.3	25.5	16.7	4.48	10.5	830	1
20174649	32	23.34	2	0	120	68	4.31	190	10	0.19	16.4	29.5	16.6	3.56	10.2	3970	1
20186413	39	27.73	1	0	121	70	4.63	187	10.2	0.19	16.4	24.5	15.1	6.15	10.3	2890	1
20174206	31	23.88	1	0	123	82	4.19	186	10.3	0.191	16.7	25.1	15.5	3.52	10.4	7220	1
20164516	31	28.28	3	0	102	64	4.41	160	11.2	0.179	16.5	25.9	18.6	4.09	10.6	2200	2
20141346	31	29.05	1	0	124	73	3.84	141	13.5	0.191	16.5	25.8	18	5.04	11.5	830	1
20164846	33	32.85	1	0	117	73	4.47	173	10.5	0.182	16.1	26.8	17.5	3.87	10.4	5230	2
20141996	32	28.93	4	0	127	73	4.15	196	9.8	0.191	16.1	28.7	19	3.82	10.1	1850	1
20178581	35	27.6	4	1	126	80	4.38	147	13	0.192	16.7	30	15.7	4.65	11	2000	1
20165385	33	25.93	2	0	110	78	4.27	160	12.5	0.2	16.4	27	17.6	3.68	10.4	510	2
20172173	34	29.07	1	0	135	69	4.2	184	10.5	0.193	16.9	26.2	16.9	4.62	10.2	2090	1
20167403	35	24.88	1	0	136	82	4.35	159	12.1	0.194	16.8	31.2	17.1	4.07	11.1	1440	1
20187492	33	27.78	1	0	131	74	3.55	189	10.3	0.194	16.3	30.1	15.7	4.42	11.1	1730	1
20192184	31	28.93	1	0	129	76	3.85	164	11.8	0.194	16.6	28.3	14.6	4.36	10.7	4070	1
20140022	25	22.11	1	0	122	87	4.14	185	10.5	0.194	16.5	26.3	18.2	4.28	10.1	1530	1
20182770	29	38.97	2	0	121	76	4.39	208	9.4	0.195	16.1	25.7	17.9	4.76	10.7	1660	1
20166838	35	25.68	3	0	122	59	3.43	101	14.9	0.135	16.9	28.9	16.7	4.97	10.6	3150	2
20166859	33	35.56	1	0	130	76	4.03	176	12.3	0.217	16.5	25.1	17.3	4.73	10.1	1780	2
20183979	28	29.02	1	0	109	62	4.47	178	11	0.196	16.5	26.7	16.9	3.08	10.8	6590	1
20167145	38	35.64	2	0	118	66	3.51	211	9.2	0.195	16.2	25.7	18.2	6.11	10.6	810	2
20167219	33	28.52	1	0	123	77	4.73	166	9.9	0.164	16.3	27.2	17.2	4.35	11	1160	2
20167400	38	30.1	4	1	119	58	3.38	170	10.9	0.185	16.9	26.6	17.2	4.17	10.6	2400	2
20167402	30	29.3	1	0	121	74	3.36	133	11.6	0.154	16.6	27.6	17.7	4.17	10.2	2020	2
20174033	32	36.36	1	0	121	69	4.72	189	10.4	0.197	17.1	25.8	15.3	3.44	9.5	12060	1
20183657	31	29.19	1	0	104	75	4.47	156	12.6	0.197	16.4	25.3	15.5	5.1	10.3	960	1
20192303	26	27.99	1	0	131	67	4.14	203	9.8	0.197	16.2	29.9	16.1	4.87	9.9	1650	1
20140474	34	25.26	4	1	133	79	3.99	154	12.8	0.197	17	22.6	16	4.28	11.5	2120	1
20168031	31	25.71	2	0	124	73	4.32	190	10.6	0.201	16.5	27.3	18.4	4.22	10.5	3250	2
20192303	26	27.99	1	0	127	77	4.41	203	9.7	0.197	16.2	29.9	16.1	4.87	9.9	1650	1
20168385	35	26.56	1	0	131	87	3.6	176	8.6	0.151	16.1	29.5	17.6	6.42	11	580	2
20168521	32	33.01	2	0	132	79	3.48	154	11.1	0.17	16.4	26.4	18.7	3.98	9.7	2610	2
20168533	36	29.24	1	0	123	83	4.43	180	9.7	0.175	16.4	23.2	17.3	4.25	10.4	980	2
20190221	39	32.03	3	2	121	76	3.68	163	12.2	0.198	16.8	28.4	15.4	4.28	11	2110	1
20138869	24	29.91	1	0	120	75	3.48	241	8.3	0.2	15.7	24.9	16.9	3.3	11.5	2220	1
20168985	26	27.92	1	0	102	70	4.52	164	10.7	0.176	16.5	26.5	17.8	4.91	10.7	3040	2
20115754	32	28.8	1	0	116	66	4.08	195	10.3	0.201	16.7	27.4	15.9	4.9	11.9	1480	1
20118515	28	21.45	3	0	111	77	3.97	161	12.4	0.201	16.8	25.5	15.9	3.2	10.7	1940	1
20190959	27	27.76	1	0	128	77	4.01	192	10.5	0.201	16.8	27	15.9	4.28	10.6	2430	1
20169849	28	23.43	1	0	124	71	3.87	147	10.5	0.155	16.2	29.6	18	4.22	10.7	860	2
20170038	29	24.44	1	0	132	82	4.12	213	11.9	0.254	16.7	27.6	17.3	3.87	9.8	4620	2
20189531	28	33.06	1	0	126	75	4.05	220	9.3	0.204	16.1	27.6	14.9	5.04	10.6	1170	1
20170186	32	26.62	2	1	119	71	3.99	198	8.1	0.161	16.7	26	17.7	3.33	10.6	2240	2
20170468	34	32.05	2	1	125	66	3.87	184	9.1	0.168	15.9	22	17	3.06	10.3	360	2
20141975	34	27	2	1	130	74	3.74	225	9.1	0.204	15.7	27.6	18.2	4.42	11.2	2990	1
20170767	33	26.64	2	0	131	71	4.03	150	12.9	0.193	16.6	30.7	18.6	3.87	10.3	1820	2
20170825	30	26.56	1	0	129	78	4.33	421	8.2	0.345	15.6	29.7	20	3.26	10	620	2
20184407	32	24.65	1	0	119	86	3.94	194	10.6	0.205	17.2	27	16.9	4.31	9.7	1620	1
20119327	25	33.61	1	0	131	83	4.33	198	10.4	0.206	16.8	24.9	15.9	4.96	11.1	1990	1
20171024	25	33.7	1	0	124	69	4.58	221	10.2	0.226	16.4	27.8	15.9	4.67	9.8	840	2
20171217	34	26.35	5	2	108	62	3.42	252	13.7	0.343	16.9	27	17.6	4.49	11	5700	2
20140820	31	24.06	1	0	132	81	3.74	195	10.6	0.207	16.4	28.1	17.5	4.71	12	1180	1
20118880	30	24.18	1	0	119	68	4.27	205	10.2	0.208	16.3	22.9	16.6	3.67	10.4	410	1
20171720	34	30.31	5	1	118	75	4.35	174	10.3	0.18	16.9	28.3	18	5.59	10.3	1380	2
20171774	34	20.89	2	1	122	67	3.58	128	9.7	0.125	16.8	31.9	17	4.67	11.1	2150	2
20171827	32	27.14	2	0	118	71	3.77	155	11.6	0.179	16.7	27.5	15.7	4.96	10.8	1120	2
20186699	28	23.44	2	0	124	81	3.9	191	10.9	0.208	16.6	29.2	15	4.9	10.1	1880	1
20186000	27	21.48	2	0	105	74	3.55	168	12.4	0.209	16.8	23.9	15.6	4.78	9.9	2390	1
20190274	35	22.03	1	0	126	72	4.06	167	12.6	0.209	16.4	23.8	15.6	4.24	9.8	4550	1
20172445	31	24.15	1	0	125	80	4.56	231	9.8	0.226	16.2	23.6	15.1	3.68	10.3	2730	2
20172602	25	33.7	1	0	118	69	3.74	221	10.2	0.226	16.4	27.8	15.9	4.67	9.8	840	2
20172787	27	23.52	1	0	124	77	4.96	123	10.8	0.133	17	26.6	16.7	2.6	10.2	1330	2
20141023	32	32.88	1	0	128	79	3.77	204	10.2	0.209	16.1	26.1	18.2	6.28	11.3	2200	1
20119755	29	24.62	1	0	130	74	4.06	197	10.6	0.21	16.6	25.4	15.7	5.14	10.7	1280	1
20168288	27	24.22	1	0	133	75	3.97	188	11.1	0.21	17	23	17.2	4.22	9.8	1000	1
20162946	29	27.66	2	0	108	76	4.02	188	11.2	0.211	16.4	25.5	17.2	4.11	10.1	1250	1
20174918	36	27.24	2	1	126	72	4.27	131	14.5	0.19	16.7	26.9	15.1	5.6	10.1	2050	2
20174946	30	26.5	1	0	117	77	4.07	152	9.8	0.149	17.2	28.7	16.3	2.98	11.2	830	2
20189652	28	30.04	1	0	122	74	3.96	167	12.8	0.213	17.1	27.1	15.6	3.83	10.7	/	1
20180789	32	25.92	3	0	101	60	3.99	159	13.4	0.214	16.5	30	16.1	3.83	10.2	930	1
20141678	29	32.6	1	0	115	65	4.03	177	12.1	0.214	16.6	28.6	17.8	5.22	10.7	1150	1
20175610	23	32.69	1	0	122	66	4.3	182	12.3	0.223	16.8	29.8	15.7	3.66	11.4	3630	2
20175671	28	25.41	1	0	116	68	4.73	204	9.4	0.192	16.7	29.5	15.3	3.74	10.2	4940	2
20188446	31	28.59	1	0	117	79	3.99	206	10.4	0.216	16.6	24.9	15.3	4.71	10.4	1900	1
20116748	28	31.51	1	0	134	77	4.43	230	9.5	0.217	16.1	26.9	16.8	4.72	10	760	1
20176715	22	22.7	1	0	123	66	3.69	219	10.4	0.229	16.8	25.6	15.8	6.49	10	6340	2
20177280	25	27.56	1	0	125	67	4.11	172	11.6	0.2	16.8	28.4	15.8	4.26	10.8	950	2
20118043	23	21.88	2	0	138	85	4.15	204	10.7	0.217	16.6	26	16.8	2.69	10.7	1670	1
20118208	29	21.56	2	0	125	73	3.92	191	11.5	0.219	16.7	30.1	18.7	3.25	11	2420	1
20177840	36	29.3	1	0	119	71	4.95	142	13.6	0.194	16.9	26.1	15.6	4.51	11	1240	2
20119157	26	24.58	1	0	108	66	4.21	182	12.1	0.219	16.9	28.1	16.5	4.36	11	5660	1
20166565	24	25.9	1	0	132	86	4.19	180	12.2	0.22	17	27.5	16.7	5.59	10.2	2460	1
20179056	35	31.99	3	1	118	71	3.58	127	12.3	0.157	17	26.9	16.6	3.41	9.7	1720	2
20115731	29	22.06	1	0	107	70	3.53	230	9.6	0.221	16.4	26.7	17.1	6.87	10.5	7700	1
20175610	23	32.69	1	0	129	79	3.89	182	12.3	0.223	16.8	29.8	15.7	3.66	11.4	3630	1
20179254	31	27.7	1	0	121	81	3.82	120	15.1	0.181	16.8	26.2	15.6	6.5	10.8	1790	2
20179259	39	30.86	5	1	103	72	4.49	163	11.6	0.19	16.7	25.2	15.5	3.83	10.1	3010	2
20179330	35	32.32	4	2	119	75	3.36	191	14.4	0.275	16.8	29.6	17.2	4.14	10.8	1470	2
20139229	29	27	1	0	122	78	4.01	206	10.8	0.223	16.1	26.9	16.9	4.36	10.5	2320	1
20121590	25	28.28	1	0	137	87	4.81	189	11.8	0.224	16.2	23.6	14.9	4.49	22	600	1
20179884	28	31.38	3	1	131	74	3.34	269	10.8	0.289	16.2	28.8	15.7	4.51	11.5	2460	2
20122257	25	28.28	1	0	137	87	4.81	189	11.8	0.224	16.2	23.6	14.9	4.49	11	600	1
20180046	36	29.83	5	1	128	74	3.48	188	12.6	0.238	17	25.4	17	5.38	10.7	4720	2
20172250	25	29.55	3	0	132	87	3.98	184	12.2	0.224	16.9	24.3	15.2	6.09	11.4	1150	1
20141491	32	25.78	1	0	120	70	3.86	204	11	0.225	16.4	25.8	18.7	4.56	9.8	1790	1
20180609	30	36.31	3	2	117	68	3.77	158	11	0.173	16.6	33.4	17	5.34	10.9	1170	2
20169343	32	31.24	2	0	121	79	4.09	265	8.5	0.226	16.1	26.7	17	4.73	10.3	2720	1
20180737	30	34.47	3	1	109	64	3.87	194	12.3	0.238	16.6	28.1	16.4	3.39	10.7	630	2
20180658	28	28.68	1	0	107	69	3.97	194	11.7	0.227	16.8	29.6	15.7	4.94	11	1310	1
20138935	31	33.25	3	0	126	71	3.75	202	11.2	0.227	16.2	32.5	17.5	4.56	10.1	1800	1
20118047	25	29.49	2	1	107	55	4.55	256	8.9	0.228	16	23	16	5.22	10.4	1200	1
20180084	26	25.16	1	0	127	70	3.77	232	9.8	0.228	16	27.9	16.5	3.32	10.3	4860	1
20188712	26	31.15	1	0	127	72	4.31	205	11.1	0.228	16.7	24.5	15.6	4.75	10.2	3800	1
20164957	31	21.22	1	0	117	61	3.36	235	9.7	0.229	16.1	24.9	17.4	3.47	10	5330	1
20116617	27	22.37	1	0	115	65	4.54	207	11.1	0.23	16.1	29.3	17.9	2.61	10.9	2170	1
20162447	32	26.22	1	0	105	70	3.92	220	10.5	0.23	17	25.2	17.5	6.62	10.4	2490	1
20181803	35	27.34	2	0	100	76	3.98	143	10.5	0.151	16.6	24.5	17.2	3.04	9.6	6480	2
20140418	31	23.88	2	1	122	78	4.06	258	8.9	0.23	16.1	25.5	16.6	5.04	11.6	940	1
20181974	30	31.81	1	0	121	67	3.81	236	10.1	0.237	16.3	27.2	15.5	4.65	11.1	6560	2
20182082	33	30.48	1	0	127	74	4.19	143	11.1	0.159	16.8	29.4	15.4	4.14	11.2	1100	2
20182266	28	24.51	1	0	118	62	3.49	191	11.4	0.218	16.4	31.4	15.5	6.5	10.6	420	2
20182536	26	35.56	1	0	121	70	3.51	223	9.6	0.214	16.3	25.8	16	4.65	10.6	630	2
20182590	39	21.11	3	1	115	71	3.61	198	12.1	0.239	16.6	26.1	17.9	4.97	10.5	780	2
20169772	26	25	1	0	121	75	4.19	216	10.7	0.232	16.4	25.1	18.5	4.9	9.2	/	1
20185075	28	28.21	1	0	115	75	3.89	219	10.6	0.232	16.2	25.2	16.7	4.21	10.3	1240	1
20166869	33	34.89	6	2	124	63	3.98	201	11.6	0.233	17.1	25.4	17.2	5.59	11.5	880	1
20183552	34	27.08	1	0	128	71	4.41	157	12.9	0.203	16.6	28.3	17	5.6	10.9	2380	2
20170469	29	28.84	1	0	128	75	4.57	247	9.4	0.233	16.4	25	16.1	5.59	11	910	1
20183751	28	24.79	1	0	119	67	3.39	150	11.5	0.173	17.1	26.6	15.8	3.45	9.8	3070	2
20140988	28	33.21	1	0	133	81	4.25	237	9.9	0.233	16.1	24.7	18.9	3.82	11.1	2150	1
20178728	28	28.13	1	0	123	78	4.28	229	10.3	0.235	16.6	23.8	16.1	4.19	10.3	2740	1
20121255	28	24.35	1	0	128	81	3.67	204	11.6	0.236	17	26.9	18.9	3.3	10.4	1000	1
20184058	30	25.71	4	1	121	68	3.48	112	12.3	0.137	17.3	25.8	16	4.9	9.6	4500	2
20122107	55	24.35	1	0	128	81	3.67	204	11.6	0.236	17	26.9	18.9	3.3	10.4	800	1
20138525	29	29.59	1	0	116	82	3.89	223	10.6	0.236	16.5	27.1	18.9	4.16	10.2	520	1
20184811	30	25.04	1	0	122	71	3.61	116	10.4	0.12	16.5	29.4	16.4	2.89	10.1	1480	2
20184865	30	29.38	1	0	116	68	3.75	126	12.6	0.158	16.5	28.9	16.4	3.45	10.7	940	2
20118633	29	26.96	1	0	123	74	3.98	242	9.8	0.237	16.1	26.5	17.3	4.72	10.7	940	1
20119553	29	24.11	1	0	106	52	3.69	279	8.5	0.237	15.8	26.7	17.2	3.92	10.2	770	1
20185210	31	19.67	1	0	123	68	5.16	105	13.6	0.143	16.4	28.4	15.1	4.55	10.3	1230	2
20163623	30	26.84	1	0	123	63	4.8	221	10.8	0.238	16.9	27.6	16.6	4.25	10.1	1090	1
20185487	27	27.18	1	0	131	78	4.15	188	8.7	0.164	16.5	27.1	16.3	4.54	11.2	5190	2
20189060	27	23.21	1	0	127	87	4.55	206	11.6	0.238	16.8	25.5	15.9	6.52	10	1230	1
20186119	36	26.49	4	0	123	71	3.39	95	13	0.124	16.5	33.9	16.8	3.67	11	2860	2
20118153	31	33.18	2	0	125	83	4.47	219	10.9	0.239	16.7	26.7	16.2	3.43	12.1	1850	1
20186429	33	34.72	3	1	130	77	3.95	257	9.1	0.233	16	24.7	16.7	5.04	10.8	2170	2
20186437	32	23.52	3	1	128	75	3.68	170	12.7	0.215	17.4	25.8	16.4	2.35	9.9	1400	2
20186528	37	21.23	2	0	126	72	4.66	147	10.5	0.155	16.6	29.9	15.9	3.92	10.2	1960	2
20162840	36	22.35	2	0	132	79	5.17	237	10.1	0.24	16.6	25.8	17.4	3.63	9	1680	1
20163932	31	17.26	1	0	116	71	4.55	257	9.4	0.242	16.2	25.5	17.6	5.3	9.9	2370	1
20165787	43	29.14	4	1	127	81	4.09	223	10.9	0.242	16.6	23.8	17.9	5.82	10.5	6570	1
20179709	30	29.83	2	0	133	79	3.81	274	8.9	0.242	16.2	23.4	15.5	4.51	10.2	1460	1
20184893	30	29.78	1	0	115	69	3.85	216	11.2	0.242	16.1	27.1	16.8	4.42	9.6	850	1
20117093	28	29.57	3	1	124	75	4.22	257	9.4	0.243	16.2	29	16.6	3.92	11.6	1940	1
20119134	29	27.42	1	0	129	84	4.66	237	10.3	0.243	16.1	23.4	17.8	4.36	10.6	2200	1
20181966	29	26.33	1	0	126	67	4.03	199	12.2	0.243	16.1	30.8	15.2	4.51	10.9	1850	1
20189064	28	31.4	3	0	120	70	3.99	208	9.6	0.199	15.9	27.5	15.9	5.82	10.9	1530	2
20120339	33	27.01	3	1	115	83	4.5	249	9.8	0.244	16	27	15.3	4.13	10.9	2250	1
20163555	27	27.51	1	0	125	70	4.92	244	10	0.244	16.3	28.4	24.4	4.51	10.3	2300	1
20163585	27	33.3	1	0	136	88	4.37	188	13	0.244	16.5	26.6	17.5	4.73	10.4	1350	1
20175981	30	31.41	1	0	127	78	4.42	256	9.6	0.245	16.2	24.9	15.2	4.65	15.2	940	1
20117148	26	30.81	1	0	114	74	4.76	303	8.1	0.246	15.8	24.4	15.7	4.83	10.8	910	1
20175376	29	32.42	2	1	130	87	4.47	263	9.4	0.246	16.1	25.5	14.7	6.18	11.9	1320	1
20185332	28	27.4	1	0	125	68	3.47	208	11.8	0.246	16.4	24.1	16.5	4.54	10.5	1180	1
20189183	34	28.26	1	0	127	69	4.11	189	10.8	0.204	16.6	28.9	15.8	3.67	10.4	2290	2
20166524	29	29.04	2	0	132	86	4.03	255	9.7	0.248	16.2	24.5	15.3	6.62	11.2	820	1
20190425	33	24.3	5	1	133	74	4.23	213	11.4	0.242	16.3	28.8	17.7	3.75	9.6	1160	2
20191809	27	30.84	1	0	133	72	3.49	249	10	0.2481	16.1	28.5	14.8	6.15	10.2	2040	1
20141114	33	32.23	2	0	124	71	4.11	292	8.5	0.249	16.2	26.8	17.5	5.06	11	2120	1
20184211	40	33.65	4	0	132	82	4.01	311	8	0.25	16	26.7	14.8	4.42	11.2	6040	1
20181393	32	30.86	2	0	122	78	4.9	278	9	0.251	16.3	24.7	16.9	4.53	10.9	1500	1
20190657	30	37.83	1	0	111	72	4.24	305	10	0.306	15.9	24.8	15.1	4.36	10.1	840	2
20191226	28	35.65	2	1	130	69	4.11	240	10.6	0.255	16.8	24.8	15.3	4.87	10.9	1960	1
20190671	33	24.16	2	0	122	68	3.87	116	10.8	0.125	17.1	27.4	17.7	2.97	10	1660	2
20191054	27	32.72	1	0	132	75	4.25	240	10.7	0.256	16.6	28.7	17.1	4.71	10.2	1940	1
20125005	34	27.53	2	0	127	79	3.95	262	9.8	0.257	16.5	26.9	17	4.48	10.6	1760	1
20180806	35	30.41	2	0	109	73	3.49	268	9.6	0.258	16.7	27.1	15.2	5.6	10.7	4100	1
20189768	30	31.89	1	0	124	72	3.87	255	10.1	0.258	16.4	26.6	15.7	4.48	9.7	1260	1
20163206	24	26.72	1	0	131	77	3.85	224	11.6	0.259	16.1	24.6	17.2	4.49	10.9	1390	1
20191002	31	31.11	2	0	133	79	4.21	138	10.5	0.145	16.7	28.5	16.4	4.28	10.2	3560	2
20172092	27	27.31	1	0	107	76	3.9	248	10.5	0.26	16.8	25.6	16.8	4.93	10.6	1500	1
20183397	27	34.96	1	0	116	89	4.31	236	11	0.26	16.3	26.6	15.1	4.94	10.4	6020	1
20167819	27	27.54	1	0	129	77	4.1	226	11.5	0.261	16.2	24.4	17.7	4.4	10	2040	1
20165187	30	34.57	3	1	132	85	4.34	290	9	0.262	16.4	27.8	17.7	4.11	10.7	1980	1
20114580	33	26.77	1	0	110	55	4.1	282	9.4	0.265	16.6	25.8	16.2	3.52	9.7	1260	1
20164449	26	24.14	1	0	119	79	4.62	231	11.6	0.267	16.7	27.2	17.7	3.42	11.1	1080	1
20169137	32	27.85	1	0	114	72	3.96	265	10.2	0.269	16.3	29.6	18.2	4.07	10.2	2950	1
20120925	31	30.94	1	0	127	76	4.72	291	9.3	0.27	16.1	26.9	16.5	6.1	10.4	860	1
20189098	25	34.89	1	0	129	77	3.88	298	9.2	0.275	16.2	25.2	14.5	4.48	10.5	2010	1
20171326	22	42.05	2	0	112	66	5.56	286	9.8	0.281	16.1	27.3	17.3	4.77	9.7	1760	1
20116555	25	26.99	1	0	112	74	4.5	355	8.1	0.286	15.8	25.1	16.6	4.1	11.5	2830	1
20162843	28	26.56	2	0	117	77	4.74	241	11.9	0.288	16.2	24.1	16.6	4.91	9.7	2440	1
20179569	30	30.49	1	0	129	79	4.43	260	11.2	0.29	16.4	25.8	15.3	6.18	10.2	2400	1
20179957	29	35.27	1	0	112	69	5.37	307	9.6	0.296	16.5	25.8	15	6.79	11.2	3900	1
20118025	30	26.95	3	0	123	73	3.88	319	9.3	0.297	16.5	27.2	15.9	5.75	11.4	1360	1
20182968	33	26.7	3	1	117	69	4.08	320	9.4	0.302	16.3	27.8	16.2	3.32	9.7	1050	1
20180346	26	32.47	2	0	134	83	4.5	288	10.6	0.304	15.8	25.6	14.4	6.49	11.2	870	1
20141699	29	29.32	3	0	135	78	4.36	285	10.7	0.305	16.4	25.8	17.7	5.51	11.2	1300	1
20161915	36	30.11	2	0	116	66	4.71	308	10.1	0.31	16.7	25.7	21.4	4.78	10.9	1600	1
20180903	26	29.05	1	0	119	76	4.11	271	12	0.326	16.6	30	20.4	5.91	9.9	670	1
20175744	28	24.15	1	0	120	70	4.05	85	14.2	0.328	17	25.8	16.7	4.61	9.6	1310	1
20123299	30	33.33	3	0	130	82	4.32	313	10.5	0.329	16.3	27	16.6	3.45	11.1	4940	1
20168856	31	26.17	2	0	129	74	4.14	308	11.2	0.344	16.4	30.1	18.6	6.11	10.9	4780	1
20177836	26	22.3	1	0	107	66	3.73	274	12.9	0.353	16.8	24.7	15.6	4.14	9.8	6830	1
20181456	27	34.83	1	0	132	81	4.63	376	9.5	0.358	16.6	31.3	15.7	5.58	11.1	880	1
20161667	27	31.25	1	0	120	68	4.84	356	10.6	0.377	16.7	25.2	17.8	6.85	10.2	1880	1
20191483	25	33.11	2	0	125	72	3.67	122	12.8	0.156	16.7	28.2	16	5.07	9.3	1720	2
20191727	28	34.74	1	0	112	65	3.78	100	12.3	0.123	17	28.7	17.9	2.77	9.2	6940	2
20191728	31	24.51	1	0	129	77	3.58	130	12.4	0.161	16.8	29.7	16.7	3.83	9.8	2050	2
20192127	27	23.53	1	0	127	68	4.22	139	10.5	0.142	16.7	27.9	16.5	3.81	10	1420	2
20192514	31	25.48	1	0	125	74	3.99	132	12.4	0.142	16.7	37	15.1	4.48	10.9	2090	2
20161660	31	30.04	2	1	127	78	4.76	405	9.4	0.379	16.3	30.7	16.9	5.9	11.1	3920	1
20192603	40	21.26	2	0	119	66	3.64	160	11.3	0.181	16.5	28.3	16.5	2.95	10.4	1530	2
20193068	27	28.56	1	0	124	71	3.94	212	10.6	0.225	16.3	29.1	16	3.83	10	1060	2
20193248	36	27.29	3	1	131	75	4.41	207	9.9	0.205	16.2	27.9	16.4	3.92	10.2	2070	2
20194105	30	22.76	1	0	128	78	4.39	144	12.5	0.18	16.7	25.8	18.3	2.42	9.9	2460	2
20194687	28	29.21	1	0	131	75	4.51	204	10.9	0.222	16.6	27.3	16.2	4.23	11.3	1190	2
20195094	34	26.41	1	0	129	77	4.28	149	10.5	0.156	16.2	24.3	16.6	2.85	9.3	1420	2
20140186	28	27.96	1	0	132	74	3.72	214	10.6	0.228	15.7	28	21.1	3.73	9.4	1910	2
20140286	33	20.7	1	0	128	74	4.12	105	14	0.147	16.7	26.3	19.2	4.36	10.4	2680	2
20170927	28	30.94	1	0	121	68	4.51	446	10.4	0.463	16.2	24.1	17.2	5.59	10.6	750	1
20143121	25	25.71	3	0	122	69	3.94	150	11.9	0.179	16.2	23.7	19.8	3.73	9.4	2460	2
20143284	30	22.27	3	1	131	75	4.17	126	12.8	0.161	16.6	25.6	19.6	4.15	11	2180	2
20143325	30	23.05	1	0	127	78	3.99	175	11.3	0.198	16.7	31.5	17.8	3.83	10.5	3110	2
20143829	24	23.94	1	0	129	71	4.24	156	11.6	0.181	16.3	26.5	20.1	4.45	10.1	5700	2
20144450	34	26.04	1	0	131	79	3.71	197	10.6	0.209	15.9	25.8	18.4	3.59	10.5	1800	2
20144864	26	28.7	1	0	122	72	4.55	210	10.6	0.222	16.8	27.7	18.1	3.65	10.8	1560	2
20147163	44	29.74	2	1	131	76	3.84	172	10.9	0.188	16.4	22.2	20.5	1.87	11.1	600	2
20147323	33	28.13	2	0	127	71	4.2	143	10.9	0.156	15.9	26.2	19.4	3.02	10.6	1580	2
20148349	45	25	4	1	131	75	3.95	145	14.6	0.211	17	23.5	17.8	6.35	11.5	4730	2
20148672	24	33.98	1	0	128	71	4.09	216	11.9	0.257	16.8	26.1	18.5	6.48	11.7	600	2
20149463	33	27.36	1	0	131	81	4.18	76	10.4	0.079	16.5	27.8	21.2	3.25	10.1	1590	2
20149586	27	33.98	1	0	122	79	3.66	219	12.4	0.271	16.9	26.8	17.7	4.61	10.2	3750	2
20149876	33	24.79	2	0	119	71	4.08	155	12.2	0.188	16.5	25.6	17.1	3.35	10.7	2340	2
20154687	31	25.3	1	0	131	82	4.71	180	11.1	0.199	16.3	25	18.6	3.47	10.3	1370	2
20154795	32	22.46	2	0	127	75	3.35	196	11.6	0.226	16.3	26.6	19.1	2.9	9.7	4480	2
20155256	35	24.75	1	0	128	77	4.21	130	12	0.156	16.4	28.5	17.7	3.73	9.9	2360	2
20155775	34	42.11	2	1	118	80	4.45	281	9	0.253	16.2	25.3	17.3	4.82	10	2040	2
20155968	31	26.8	1	0	128	76	4.15	164	8.8	0.144	16.5	27.5	16.1	5.08	9.8	3500	2
20156096	31	30.65	2	0	133	82	4.38	297	8.9	0.263	16.2	25.9	17	4.27	9.9	400	2
20157715	30	24.64	1	0	122	71	4.33	118	11.3	0.134	16.7	26.6	17.9	4.95	10	3000	2
20157757	29	33.41	1	0	135	82	3.89	254	11.7	0.297	16.7	27.6	18.2	3.88	9.8	1210	2
20157785	30	32.42	1	0	127	79	4.51	238	11	0.261	16.4	26.4	16.7	4.4	11.3	8080	2
20159193	27	28.89	1	0	130	78	3.84	171	11.2	0.191	16.7	27.6	17.6	4.78	11.3	2840	2
20160174	27	29.3	4	1	128	76	4.81	217	9.7	0.21	16.4	27	17.8	4.38	10.2	2150	2
20160693	29	30.47	1	0	131	83	3.94	101	9.9	0.101	16.5	30.1	18.5	4.63	9.9	1030	2
20161060	42	28.69	3	0	129	76	4.47	143	12	0.171	16.3	42	20.5	2.2	12.7	24430	2
20094973	37	23.49	4	1	131	77	4.19	210	10.9	0.229	16.8	27.7	17.1	3.75	11.4	/	2
20069943	31	27.06	3	1	128	74	4.22	87	16.3	0.142	16.9	23.4	18	5.38	11.2	/	2
20089527	32	35.28	2	0	117	71	3.87	257	10.7	0.276	16.6	24.1	18.6	2.96	10.7	700	2
20089608	26	31.25	4	1	120	67	4.03	210	9.7	0.204	16.3	26	18	4.75	11.3	1120	2
20091581	32	25.72	5	0	131	82	4.62	171	12.6	0.215	16.6	27.9	17.3	3.75	10.7	1790	2
20078041	30	24.8	2	1	122	70	4.75	101	8.9	0.09	16.6	24.8	19.5	2.96	10.2	4200	2
20091947	25	32.89	1	0	118	69	4.88	195	9.3	0.182	16.5	24.6	17.5	3.87	11.6	/	2
20071334	25	26.8	2	1	122	70	4.75	222	10.3	0.23	16.4	25.6	18	4.49	10.3	740	2
20071762	37	26.44	3	1	118	71	3.85	118	11.5	0.136	16.6	22.5	18.8	2.13	9.2	2280	2
20071939	24	27.61	3	0	117	68	4.02	198	10.4	0.205	16.3	24.4	17.5	2.52	9.3	1330	2
20081561	33	28.28	3	0	126	74	3.84	249	10.5	0.261	16.4	23.2	17.7	3.93	9.3	270	2
20087637	40	26.74	7	1	122	70	4.15	207	10.2	0.211	16.2	28.1	17.3	3.06	11.7	3700	2
20087704	29	29.02	3	1	127	65	3.87	234	10.7	0.25	16.5	28.7	17.1	3.39	10.8	/	2
20087741	37	26.17	5	1	131	71	4	131	12.3	0.161	16.8	28.7	17.5	3.45	11.2	1110	2

## Sheet: Control-Group
Index	Age	BMI	Gravidity	Parity	SBP	DBP	FBG	PC	MPV	PCT	PDW	APTT	TT	FIB	PT	D-dimer	Outcome
20182135	32	26.91	1	0	107	69	4.95	108	12	0.123	16.6	25.2	15.2	3.74	9.9	2040	0
20172385	27	23.43	2	0	118	70	4.44	152	8.4	0.127	16.3	33.8	15.9	4.41	11.6	1280	0
20172410	27	25.85	1	0	127	71	4.15	111	11.6	0.128	16.8	28.6	15.6	4.63	10	1090	0
20182282	32	24.23	2	1	101	51	3.84	150	8.7	0.131	16.6	26.3	15.4	3.83	10.3	1900	0
20180560	31	24.72	1	0	122	75	4.64	120	11	0.131	16.8	25.8	16.5	4.74	10.9	1480	0
20182386	29	24.22	1	0	120	77	4.36	136	9.8	0.133	16.7	24.6	15	3.83	10.7	2160	0
20183898	30	17.45	1	0	98	58	4.3	123	10.9	0.134	17.1	26.1	15.9	3.73	10.6	1260	0
20180435	30	24.39	1	0	102	72	4.22	164	8.2	0.135	16.1	25.9	15	3.93	10.6	3070	0
20182272	31	24.09	1	0	85	54	4.54	131	10.4	0.136	17.1	27.6	16.1	4.76	10.2	2190	0
20180455	36	28.13	3	1	108	50	4.17	131	10.4	0.136	17	29.8	15.5	4.38	11	2350	0
20183801	31	24.03	1	0	103	54	4.47	140	10	0.139	16.4	24.3	14.7	5.51	10.2	1940	0
20182405	24	25.16	1	0	112	61	4.06	137	10.4	0.142	17.4	30.9	16.6	4.61	10.5	2790	0
20182407	31	24.5	1	0	106	66	4.01	173	8.2	0.143	16.1	27.4	15.6	4.14	11.4	1240	0
20182562	33	23.05	4	1	87	57	4.12	123	11.6	0.143	17.3	25	15.6	3.93	10.6	1020	0
20183795	36	22.72	3	1	88	56	3.61	161	9	0.144	16.8	26.8	15.5	4.02	10.1	1510	0
20183825	31	28.64	2	1	126	75	4.28	170	8.7	0.148	15.8	25	15.2	4.87	10.6	2080	0
20183861	29	27.47	2	1	111	60	4.35	186	8.1	0.15	16.3	27	14.9	4.36	10.3	2400	0
20182273	36	21.68	2	1	100	60	4.4	111	13.6	0.151	17.2	28.1	16.6	2.64	10	1800	0
20172407	28	27.05	1	0	131	75	4.29	151	10	0.151	16.7	26.6	15.8	4.77	10.8	1000	0
20182815	25	24.84	2	1	116	66	4.62	141	10.8	0.153	17.1	28.5	16	3.94	9.9	2350	0
20182143	33	31.65	2	1	121	64	4.14	154	10	0.154	16.6	24.7	17.1	3.2	10.6	1990	0
20183924	31	22.94	3	1	122	79	4.17	136	11.4	0.155	17.1	29.7	15.6	6.15	11	950	0
20182325	37	25	4	1	109	81	4.01	174	9	0.156	16.7	32.9	14.8	4.94	11.4	4940	0
20182608	37	25.97	2	1	103	57	3.92	165	9.5	0.157	16.6	25.2	14.6	3.73	11.1	3850	0
20172423	29	22.76	1	0	127	75	3.47	136	11.6	0.157	16.3	29	15.8	3.68	12.4	2650	0
20182445	34	24.6	1	0	106	51	4.1	170	9.4	0.159	16.4	25.9	17	3.14	10.3	2930	0
20183798	28	29.72	1	0	99	55	4.18	142	11.2	0.159	16.5	27.9	15.1	4.95	9.9	1900	0
20183916	30	24.41	2	0	95	66	4.18	148	10.8	0.159	16.9	25	14.4	3.612	10.2	1710	0
20172382	30	25.63	2	0	119	68	3.77	148	10.8	0.16	16.9	29.1	17.4	4.77	11	1970	0
20182258	29	24.24	1	0	98	60	3.88	137	11.8	0.161	17.3	24.9	15.3	3.64	10.5	3490	0
20183859	32	21.96	1	0	102	55	3.99	118	13.6	0.161	16.7	27.2	15.6	4.48	10.3	2050	0
20180508	37	25.68	6	1	121	58	3.99	168	9.6	0.162	16.1	30.1	16	4.14	11.1	1970	0
20182099	33	28.52	1	0	118	72	4.21	176	9.3	0.164	16.4	28.6	14.4	4.03	11	3030	0
20182223	31	29.23	1	0	111	55	4.87	169	9.8	0.165	16.8	29.1	15.1	5.24	11.2	1570	0
20182376	29	23.3	2	1	94	53	3.95	181	9.1	0.165	16.6	25.9	16	3.41	10.3	3150	0
20183857	30	22.64	1	0	124	64	4.13	139	12	0.166	17.1	27.1	15.2	3.72	9.6	1430	0
20180458	28	22.76	2	1	107	54	4.48	182	9.1	0.166	16.6	24.4	15.7	2.9	10	2640	0
20182308	35	27.85	2	1	100	76	3.8	137	12.2	0.167	17	23.4	15.3	5.1	10.9	2130	0
20182778	28	25.93	2	0	110	58	3.73	166	10.1	0.167	16.7	26.3	15.9	4.61	10.1	3970	0
20183908	33	26.35	2	1	118	72	4.08	168	9.9	0.167	16.5	25.1	14.9	4.36	10.4	2070	0
20180521	36	27.47	1	0	96	51	4.19	167	10	0.167	16.5	28.5	15.1	5.6	11.1	4570	0
20172404	38	20.83	3	1	118	64	4.14	149	11.2	0.167	16.9	27.7	16.2	3.44	9.6	3880	0
20180484	33	22.95	2	1	121	81	3.72	167	10.1	0.168	16.7	27.5	14.5	4.26	10.9	221	0
20182589	28	24.84	2	0	111	62	4.09	150	11.3	0.169	17.2	26.7	17.2	4.76	9.8	3110	0
20180411	25	26.01	1	0	86	52	4.43	185	9.2	0.169	16.3	32	15	4.14	11	2400	0
20180587	34	37.46	3	1	128	74	3.89	127	13.4	0.171	16.7	29.7	15.7	4.79	10.9	1100	0
20182663	30	22.77	1	0	97	59	3.82	216	8	0.172	15.7	25.4	14.8	5.88	10.3	1060	0
20180470	36	27.31	2	0	110	66	4.05	167	10.3	0.172	16.8	27.2	15.3	4.26	10.9	1370	0
20182322	31	22.46	2	1	98	60	4.05	140	12.4	0.173	16.9	25.8	15.8	4.94	10.8	710	0
20182758	30	26.53	3	1	94	60	4.36	189	9.2	0.174	16.5	25.9	14.9	5.88	10.4	3420	0
20180482	32	25.78	2	1	106	59	4.05	184	9.5	0.175	16.9	25.5	15.8	3.49	9.8	2280	0
20182431	31	28.04	1	0	109	63	4.3	177	9.9	0.176	16.6	25.8	15.8	3.64	10.9	750	0
20182727	29	28.76	1	0	122	70	4.86	186	9.4	0.176	16.6	27.3	14.8	4.94	11.1	2700	0
20183853	29	26.22	1	0	124	60	3.76	152	11.6	0.176	16.8	26.8	15	3.81	10.6	1520	0
20172413	27	27.06	2	0	126	78	3.78	196	9	0.176	16.8	24.9	15.4	4.39	9.2	3690	0
20182201	30	22.96	1	0	102	58	4.15	192	9.3	0.178	16.1	30.4	15.7	5.88	10.4	870	0
20182303	37	25.89	3	1	113	70	4.04	192	9.3	0.178	16.4	27.9	14.6	6.18	11.5	3470	0
20180524	36	26.17	1	0	116	60	3.78	170	10.5	0.178	16.7	28.4	16.9	4.82	10.8	3030	0
20180557	24	22.13	1	0	117	71	4.14	168	10.6	0.178	17	26.1	15.8	3.57	10	2250	0
20172389	34	29.02	3	1	132	75	3.29	212	8.4	0.178	15.8	27.2	16.4	4.41	11.3	2300	0
20172426	29	28.03	2	0	118	68	4.28	173	10.3	0.178	16.3	26.4	15.7	3.77	10.6	3600	0
20183797	32	24.09	2	1	100	58	3.75	158	11.3	0.179	16.6	26.4	18.3	3.41	11.7	1380	0
20182125	28	23.05	1	0	115	70	4.06	160	11.3	0.18	16.5	23.6	16.2	4.06	10.8	2330	0
20182843	32	23.44	1	0	98	59	3.73	184	9.8	0.18	16.2	26.4	15.7	4.32	10	3570	0
20180461	35	24.8	1	0	116	66	4.4	160	11.2	0.18	16.6	26.2	15.2	4.19	10.3	2340	0
20172419	28	20.42	1	0	118	72	4.61	183	9.8	0.18	16.6	28	15.3	3.15	11.2	2900	0
20183968	25	23.44	2	0	116	71	4.21	174	10.4	0.181	16.6	23.2	15.8	3.92	10.7	1090	0
20182097	35	26.85	3	1	128	68	4.25	187	9.7	0.182	16.8	25.6	15.8	3.47	11.5	1740	0
20182415	26	24.8	1	0	116	69	5.36	133	13.7	0.182	17	27.3	15.1	5.88	11.3	1200	0
20182720	31	24.51	4	1	112	68	3.96	193	9.4	0.182	16.5	27.5	15.8	3.57	10.2	1500	0
20183873	27	24.33	1	0	108	58	4.36	158	11.5	0.182	16.5	23.8	15.5	3.32	11	1920	0
20172422	32	23.83	1	0	119	70	4.27	156	11.7	0.182	16.6	31.8	15.7	4.67	10.9	4500	0
20182279	29	25.34	1	0	103	54	3.8	154	11.9	0.183	16.9	26.4	16	4.32	10.3	4080	0
20180412	28	26.04	1	0	95	69	3.77	151	12.1	0.183	16.6	26.3	15.4	3.47	10.6	700	0
20182205	25	26.9	2	0	122	77	4.22	174	10.5	0.184	16.7	24.4	16.2	4.14	11.5	740	0
20182748	29	20.7	2	1	108	58	4.13	161	11.5	0.184	17.5	25	15.1	4.94	10	3250	0
20182436	26	28.34	2	1	111	67	4.16	199	9.3	0.185	16.4	25.6	17.4	4.19	10.7	1050	0
20172381	29	25.15	1	0	121	71	4.28	135	13.8	0.185	17	27	17.4	4.48	9.8	2950	0
20172405	34	23.42	1	0	124	71	4.29	184	10.1	0.185	16.1	25.4	15.8	3.86	9.1	3450	0
20182275	25	28.2	1	0	125	68	4.03	197	9.4	0.186	16.21	32.5	16.9	4.93	10.4	1220	0
20182380	36	24.84	6	1	100	57	4.11	208	9	0.186	16	24.8	17.3	3.02	10.2	1040	0
20182450	33	23.88	2	1	108	59	4.1	202	9.2	0.186	16	27.2	16.2	4.65	11.1	2340	0
20182402	30	25.44	1	0	115	62	4.17	180	10.4	0.187	16.7	27.6	16.3	4.93	10.7	2740	0
20182443	32	24.56	1	0	106	62	3.87	198	9.5	0.187	16.8	27.5	16.2	3.94	9.9	4600	0
20182283	29	21.78	1	0	106	58	4.1	225	8.4	0.188	16.2	25.7	15.4	4.46	10.2	2660	0
20180369	32	26.17	3	0	103	61	4.54	157	12	0.188	16.6	28.5	15.4	3.74	10.7	1140	0
20182404	28	24.45	3	1	102	67	3.97	183	10.4	0.189	16.3	26.5	18.2	3.65	10.1	3380	0
20172416	28	28.42	1	0	121	69	3.55	186	10.2	0.19	16.5	28.4	15.7	5.53	11.4	2300	0
20182138	25	24.09	2	0	133	69	3.68	188	10.2	0.191	16.1	26.5	15.3	4.06	9.7	3410	0
20182399	31	24.17	1	0	121	62	3.89	177	10.8	0.191	16.7	26.7	16.4	4.58	10	1690	0
20182403	27	24.47	3	1	118	68	3.96	195	9.8	0.191	16.8	26.4	16.9	3.27	10.6	2860	0
20182295	26	30.47	5	1	134	74	4.59	206	9.3	0.192	16.5	27.5	15.1	6.58	10.8	2950	0
20182369	26	23.34	1	0	95	56	3.93	197	9.7	0.192	16.2	27.2	17.4	4.76	9.7	2030	0
20183958	30	26.37	4	1	114	74	4.05	174	11	0.192	16.5	25.3	15.5	4.28	11.3	1540	0
20182656	33	20.96	2	1	93	61	4.32	173	11.1	0.193	17.3	26.5	17.81	3.34	10.5	1930	0
20180519	30	27.12	3	1	108	65	4.21	235	8.2	0.193	15.9	26.6	15.3	4.51	11	1050	0
20183863	33	24.38	1	0	103	55	4.66	184	10.6	0.195	16.1	26.7	15.1	4.36	10.3	1600	0
20183939	33	23.4	4	1	108	60	3.89	194	10	0.195	16.4	24.7	15.3	4.56	10.5	2050	0
20180459	26	26.49	1	0	111	63	3.93	203	9.6	0.195	16.7	24.9	15.3	4.06	10.4	1740	0
20182263	30	24.72	1	0	94	55	3.91	241	8.1	0.196	15.8	25	15.8	4.38	10.4	2080	0
20182285	30	28.31	2	0	129	83	3.39	213	9.2	0.196	16.3	24.6	15.5	4.26	11	3600	0
20183858	29	27.24	1	0	111	64	3.85	202	9.7	0.196	16.3	25.2	14.6	4.13	10.8	2440	0
20182129	34	23.89	1	0	96	59	3.73	169	11.8	0.198	16.9	26.1	14.6	4.79	11	6760	0
20182344	29	23.05	1	0	110	74	4.26	196	10.1	0.198	16.4	25.5	15.6	4.38	11.3	1860	0
20182669	26	27.89	1	0	99	63	4.95	259	7.7	0.198	15.8	25.4	15	4.79	10.2	4870	0
20183796	34	22.06	3	1	96	63	4.09	185	10.7	0.198	16.6	27.9	15	4.63	10.6	1700	0
20182094	30	26.67	1	0	109	62	3.59	217	9.2	0.199	16.3	26.7	15.6	3.94	10.7	2270	0
20183860	22	30.44	1	0	114	72	4.03	176	11.3	0.199	16.4	26.6	15.1	4.38	10.5	5400	0
20182130	35	26.64	1	0	96	65	4.38	250	8	0.2	15.9	24.6	15.6	3.83	9.1	1430	0
20182316	32	23.95	1	0	105	62	3.96	176	11.3	0.2	16.6	24.5	15.7	3.17	10.5	2270	0
20182247	26	23.88	2	1	112	68	3.93	206	9.8	0.201	16.1	25.5	15.2	4.38	10.1	1070	0
20182342	28	23.05	1	0	110	63	3.56	222	9	0.201	16.3	26.8	15	4.51	10.9	4440	0
20182830	29	24.61	1	0	112	59	4.01	231	8.8	0.202	16	26.7	16.4	3.56	10.4	2360	0
20183855	30	28.55	1	0	130	56	4.11	190	10.7	0.202	16.8	24.6	14.7	4.75	10.8	1570	0
20172408	33	20.89	1	0	125	72	3.95	151	13.5	0.203	16.3	27.1	16.7	5.3	10.7	2180	0
20182459	27	26.96	1	0	112	58	4.04	196	10.5	0.205	16.4	27.8	14.6	4.79	11.7	3300	0
20182528	26	27.29	1	0	91	57	4.27	181	11.3	0.205	16.9	26.1	15.5	3.32	10.4	3650	0
20182552	30	26.78	1	0	101	57	4.29	186	11	0.205	16.6	27.1	16	4.03	10.6	1240	0
20183905	31	32.01	1	0	118	69	4.66	158	12.9	0.205	17.2	27.2	15.3	5.22	11.4	1560	0
20182485	28	21.5	2	0	91	56	3.34	192	10.7	0.206	16.6	25.1	16	2.92	10.1	1250	0
20182301	27	29.2	1	0	113	63	4.54	205	10.1	0.207	17	24.3	15	4.14	10.9	1550	0
20183913	35	25.71	4	0	105	54	4.05	248	8.4	0.207	15.9	25.8	14.8	4.36	10.2	1690	0
20183933	28	27.48	1	0	129	79	3.96	153	13.5	0.207	16.3	27.3	16.1	4.71	10.9	1080	0
20180370	31	24.61	1	0	121	68	4.24	197	10.5	0.207	16.9	25.9	16.2	4.06	10.7	3370	0
20180418	36	23.21	2	1	96	56	3.76	249	8.3	0.207	16	27.9	15.5	4.94	11.2	2720	0
20182096	31	21.08	2	1	124	71	4.39	235	8.9	0.208	16.2	28.2	15.3	4.26	11.9	1050	0
20182212	32	29.55	2	0	102	62	4.68	206	10.1	0.208	16.6	25.9	18.3	4.32	11.1	3070	0
20182204	36	25.64	2	1	92	50	3.7	202	10.3	0.209	16.7	24.1	15.5	4.65	10.8	1460	0
20182763	26	24.64	1	0	114	67	3.83	224	9.3	0.209	16.5	29.4	15.7	4.38	11.2	1590	0
20183834	29	25.96	1	0	104	61	3.94	179	11.7	0.209	16.6	24.3	15.8	4.15	10.5	2240	0
20183953	34	29.3	2	1	119	72	3.89	171	12.2	0.21	16.8	24.2	15	4.75	10	1990	0
20172411	26	28.05	1	0	131	74	3.98	197	10.7	0.211	17	24.7	15.9	4.58	9.8	4140	0
20182534	29	25.56	1	0	109	67	4.32	219	9.7	0.212	16	25.6	16.3	4.76	10.1	4030	0
20183799	36	27.48	1	0	102	62	4.68	224	9.5	0.212	16.3	27.3	15.3	5.13	10.5	1740	0
20182145	29	35.06	1	0	123	81	3.86	230	9.3	0.213	16.3	25.6	15.8	4.79	11.1	1120	0
20172390	25	24.72	1	0	119	67	4.13	190	11.2	0.213	16.4	29	14.8	6.09	10.9	2220	0
20182214	27	28.04	2	0	88	51	3.96	240	8.9	0.214	16.2	25.1	16.1	2.9	9.7	4340	0
20172412	28	23.88	1	0	117	63	4.09	237	9	0.214	16.2	28.7	15.6	4.17	10.7	6900	0
20182115	29	27.89	2	1	110	71	4.58	174	12.3	0.215	17.1	28.9	15.3	4.79	11.3	3000	0
20182116	29	24.61	1	0	107	61	4.06	211	10.2	0.215	16.8	27.5	14.7	4.14	11.5	1390	0
20172420	28	25.39	2	0	125	74	3.36	222	9.7	0.216	16.4	29.3	15.4	5.12	11.7	2290	0
20182446	27	21.3	1	0	93	53	3.87	227	9.5	0.217	16.6	28.3	16	3.58	11	1470	0
20183901	32	26.85	3	2	126	66	4	210	10.3	0.217	16.8	26.6	15.9	5.51	11.4	1600	0
20182243	32	22.46	2	1	115	74	4.21	183	11.9	0.218	16.8	25	15.7	4.03	11.1	1660	0
20182832	33	28.23	1	0	119	66	4.28	205	10.6	0.218	16.6	29.7	16.3	3.56	11	3460	0
20172417	28	32.84	2	0	127	85	4.18	203	10.8	0.218	16.8	27.7	15.7	4.81	11.2	1850	0
20183887	29	19.49	4	2	99	55	4.11	251	8.7	0.219	16.1	27.2	15.5	3.92	10.7	2000	0
20182310	31	30.42	1	0	102	66	4.81	217	10.1	0.22	16.6	28.2	15.9	4.94	10.3	2500	0
20182330	28	27.11	1	0	114	72	3.69	207	10.7	0.221	16.5	27.8	16.1	4.76	9.2	1840	0
20182414	28	29.3	2	1	103	63	3.43	219	10.1	0.221	16.6	29.9	15.3	4.65	11.4	1860	0
20182441	34	28.6	2	0	119	74	4.19	232	9.5	0.221	16.6	25.9	16.2	3.34	9.9	2400	0
20182246	31	28.04	1	0	104	63	4.44	238	9.4	0.223	16.2	24.4	15.4	4.79	10.1	2260	0
20182839	31	24.05	1	0	101	59	4.33	272	8.3	0.224	16	25.9	16.1	3.65	10.2	2940	0
20182105	35	23.88	1	0	115	68	4.05	237	9.5	0.225	16	26	15.3	4.03	12.3	1440	0
20182372	31	22.41	1	0	90	57	4.18	235	9.6	0.225	16.6	27.3	16.6	4.06	9.7	5400	0
20182250	34	26.44	1	0	107	63	4.23	184	12.4	0.227	16.7	26.1	16.3	4.51	11	1470	0
20182406	31	25.43	1	0	98	58	4.18	236	9.7	0.229	16.6	29.1	16.5	4.53	10.6	2140	0
20182831	32	27.36	3	1	97	55	4.43	230	10.1	0.233	16.7	25.6	15.6	4.14	11	780	0
20182535	27	24.21	1	0	106	55	4.35	218	10.7	0.234	16.9	26	15.8	3.83	9.5	2130	0
20182799	33	23.83	1	0	114	63	4.11	229	10.2	0.234	16.5	26.8	16.5	3.94	10.2	1390	0
20182539	28	28.19	2	0	100	62	4.1	234	10	0.235	16.2	29.4	15.2	5.6	10.7	1360	0
20180471	35	26.29	3	1	114	68	3.63	186	12.6	0.235	16.5	27.6	14.8	6.18	10.8	1060	0
20182429	32	23.74	2	1	121	73	4.12	208	11.3	0.236	16.9	26	18.9	3.14	10.3	1250	0
20183842	32	20.7	1	0	92	52	4.28	208	11.3	0.236	16.9	25.1	15.4	4.42	10.4	2600	0
20182307	27	30.05	2	0	117	75	4.76	237	10	0.237	16.3	26.7	16.4	4.14	10.7	1790	0
20182494	34	26.64	5	1	99	58	4.09	218	10.9	0.237	16.6	26.4	15.1	3.39	11	1550	0
20182393	29	23.52	1	0	103	58	3.91	241	10	0.24	16.6	28.3	15.4	5.1	11.2	3240	0
20182192	33	23.78	2	1	108	60	4.27	216	11.2	0.242	17.1	33.4	16.2	4.14	11.7	610	0
20182131	32	28.52	2	1	108	76	3.96	253	9.6	0.243	16.5	27.7	16.9	4.8	11.3	1270	0
20180476	31	24.8	1	0	105	57	3.56	232	10.6	0.246	16.5	24.5	15.4	3.11	10	1120	0
20172403	24	22.25	1	0	121	69	3.35	211	0.2461	0.246	16.5	25.2	15.5	3.86	9.8	4820	0
20182312	25	23.51	3	0	106	69	4.1	237	10.4	0.247	16.5	26	16.5	5.1	10.7	2540	0
20183982	33	28.69	2	0	125	80	4.03	225	11	0.247	16.8	25.6	16	4.13	10.7	2620	0
20183862	28	24.39	1	0	98	52	4.17	218	11.4	0.249	16.7	25.3	15.2	5.04	10.2	1750	0
20182601	31	29.82	1	0	121	67	3.92	213	11.8	0.25	16.6	26.5	15	4.79	11	2100	0
20182637	30	23.31	1	0	105	60	4.21	286	8.8	0.252	16	24.6	15.5	4.03	10.9	5480	0
20180367	32	29.48	2	1	118	67	4.99	277	9.2	0.254	16.2	30.3	16	5.19	10.8	2620	0
20181852	28	30.38	2	0	115	64	4.23	246	10.4	0.255	16.3	24.4	17.1	4.32	9.8	2380	0
20182811	28	24.69	1	0	100	67	4.25	291	8.8	0.255	15.9	27	17.1	4.19	6.9	3760	0
20183868	31	26.83	1	0	95	64	3.98	255	10.1	0.257	16.6	32.1	14.5	5.22	11.4	2000	0
20180541	25	25.91	1	0	109	63	4.07	273	9.4	0.258	16.2	28.4	15.3	4.38	11.2	5440	0
20182430	29	27.41	2	1	103	54	4.02	260	10.1	0.262	16.7	28.8	15.3	4.94	11.6	3400	0
20182090	34	28.28	2	1	129	75	4.25	255	10.3	0.263	17	25.8	15.5	4.46	10.7	3380	0
20182090	34	28.28	2	1	115	62	4.24	255	10.3	0.263	17	25.8	15.5	4.46	10.7	3380	0
20182311	26	25.71	1	0	98	56	4.04	265	10.1	0.269	16.8	26.4	15.6	4.26	11.6	760	0
20182817	27	28.15	1	0	87	59	4.24	250	10.7	0.269	16.6	26.2	16.1	4.28	10.3	1140	0
20182432	23	25.39	1	0	96	61	4.23	259	10.5	0.271	16.6	27.8	20.8	4.97	10.8	2210	0
20182299	25	31.15	1	0	109	75	3.85	264	10.3	0.272	16.5	24.5	15.2	3.93	10.4	1370	0
20182328	38	25.72	5	2	100	61	3.88	275	9.9	0.273	16.6	26.3	17.7	3.49	10.3	2810	0
20182411	26	27.99	1	0	102	61	4.05	318	8.7	0.277	15.9	25.6	14.8	4.65	10.7	1770	0
20182722	25	23.03	1	0	107	61	4.12	305	9.2	0.28	15.9	28	17.5	4.19	10	1160	0
20182218	23	25.51	1	0	108	58	4.22	297	9.6	0.284	16.4	30.9	18.9	4.61	10.7	1010	0
20182448	24	25.65	2	0	115	71	3.46	234	12.2	0.287	16.2	27.8	15.5	5.88	11.5	2120	0
20182335	29	23.44	1	0	99	58	4.26	306	9.5	0.291	16.5	26	17.2	5.19	10.6	1380	0
20182332	35	27.68	2	1	121	71	4.09	304	10.3	0.312	16.2	25.7	16.3	3.57	9.8	2310	0
20180454	24	26.63	3	1	119	60	3.95	346	9.1	0.316	16.8	26	16.8	4.46	9.9	980	0
20182229	32	30.86	3	1	112	71	4.39	383	8.8	0.337	16.2	25.3	15	4.65	10.5	2360	0
20180430	30	27.64	1	0	110	76	4.42	320	11.3	0.361	16.4	24.7	16.5	3.65	9.9	2040	0

## Sheet: Note
A	Index
B	Age	years
C	BMI	Kg/m^2
D	Gravidity
E	Parity
F	SBP	systolic blood pressure(mmHg/L)
G	BP2	diastolic blood pressure(mmHg/L)
H	FGB	fasting blood glucose(mmol/L)
I	PC	platelet count(10^9/L)
J	MPV	mean platelet volume(fl)
K	PCT	plateletcrit(%)
L	PDW	platelet distribution width(%)
M	APTT	activated partial thromboplastin time(s)
N	TT	thrombin time(s)
O	FIB	fibrinogen(g/L)
P	PT	prothrombin time(s)
Q	D-dimer
R	Outcome
		0. healthy parturients
		1. mild-PE
		2. severe-PE
